# Supplementary material for: The Extreme Climate Event Database (EXCEED): Development of a picture database composed of drought and flood stimuli
Source: PubMed Central journal article supplement (PMC6147476; doi:10.1371/journal.pone.0204093), 2018-09-20
Supplement: pone.0204093.s001.pdf [file pone.0204093.s001.pdf]

Selection of 50 photos for each condition - Total of 150 photos

Web-found Creative Commons photos of scenery about natural hazards (with or without living beings) and inanimate objects

Rating of 150 photos by a convenience sample

Rated for valence and arousal dimensions in SAM scales and two five-point scale

Investigation of outliers photos classified for arousal and valence ratios

Mean plus 1.5SD for valence and mean minus 1.5SD for arousal in flood and drought; for neutral mean minus and plus 1.5SD for valence and arousal

150 Photos composed the database
